# Supplementary material
Source: MDPI journal article supplement (https://www.mdpi.com/2077-1312/11/2/331)
Supplement: s1 [file s1 › jmse-2152496-supplementary.pdf]

# Long-term contamination of the Arabian Gulf as a result of hypothetical nuclear power plant accidents

Vladimir Maderich, Roman Bezhenar, Ivan Kovalets, Oleksandr Khalchenkov, and Igor Brovchenko

**Table. S1** List of meteorological stations used for verification of calculated precipitation intensities

| Country      | Place name      | Airport Code | Wmo code | latitude | longitude |
|--------------|-----------------|--------------|----------|----------|-----------|
| Iran         | Abadan          | OIAA         | 40831    | 30.377   | 48.215    |
| Saudi Arabia | Dammam          | KFIA         | 40415    | 26.433   | 49.8      |
| Saudi Arabia | Dhahran         | OEDR         | 40416    | 26.267   | 50.167    |
| Saudi Arabia | Al Ahsa         | OEAH         | 40420    | 25.3     | 49.483    |
| Iran         | Bandar Lengeh   | OIBL         | 40883    | 26.528   | 54.828    |
| Iran         | Bandar-E-Dayyer | -            | 40872    | 27.833   | 51.933    |
| Iran         | Bushehr         | OIBB         | 40858    | 28.963   | 50.819    |
| Iran         | Kharg Island    | -            | 40845    | 29.267   | 50.267    |
| Qatar        | Doha            | OTBD         | -        | 25.273   | 51.608    |

**Table S2.** Total deposition on the surface of the Arabian Gulf calculated by RIMPUFF and DIPCOT atmospheric dispersion models for scenarios of accidents at Bushehr and Barakah NPP, described in paper; the relative difference between both estimates  $R=100\% \cdot (Q_{RIMPUFF} - Q_{DIPCOT}) / Q_{RIMPUFF}$  is presented in the last column.

| Accident Scenario | Radionuclide | Deposition on the Gulf, Bq (RIMPUFF) | Deposition on the Gulf, Bq DIPCOT | Relative Difference R, % |
|-------------------|--------------|--------------------------------------|-----------------------------------|--------------------------|
| Bushehr           | Cs-134       | 4.62E+16                             | 4.55E+16                          | 1.6                      |
| Bushehr           | Cs-137       | 9.25E+15                             | 9.12E+15                          | 1.4                      |
| Bushehr           | Ru-106       | 3.37E+16                             | 3.57E+16                          | -6.1                     |
| Bushehr           | Sr-90        | 3.13E+15                             | 3.11E+15                          | 0.68                     |
| Barakah           | Cs-134       | 4.36E+16                             | 4.21E+16                          | 3.4                      |
| Barakah           | Cs-137       | 2.43E+16                             | 2.34E+16                          | 3.7                      |
| Barakah           | Ru-106       | 7.30E+17                             | 6.10E+17                          | 16.4                     |
| Barakah           | Sr-90        | 6.10E+15                             | 5.81E+15                          | 4.8                      |

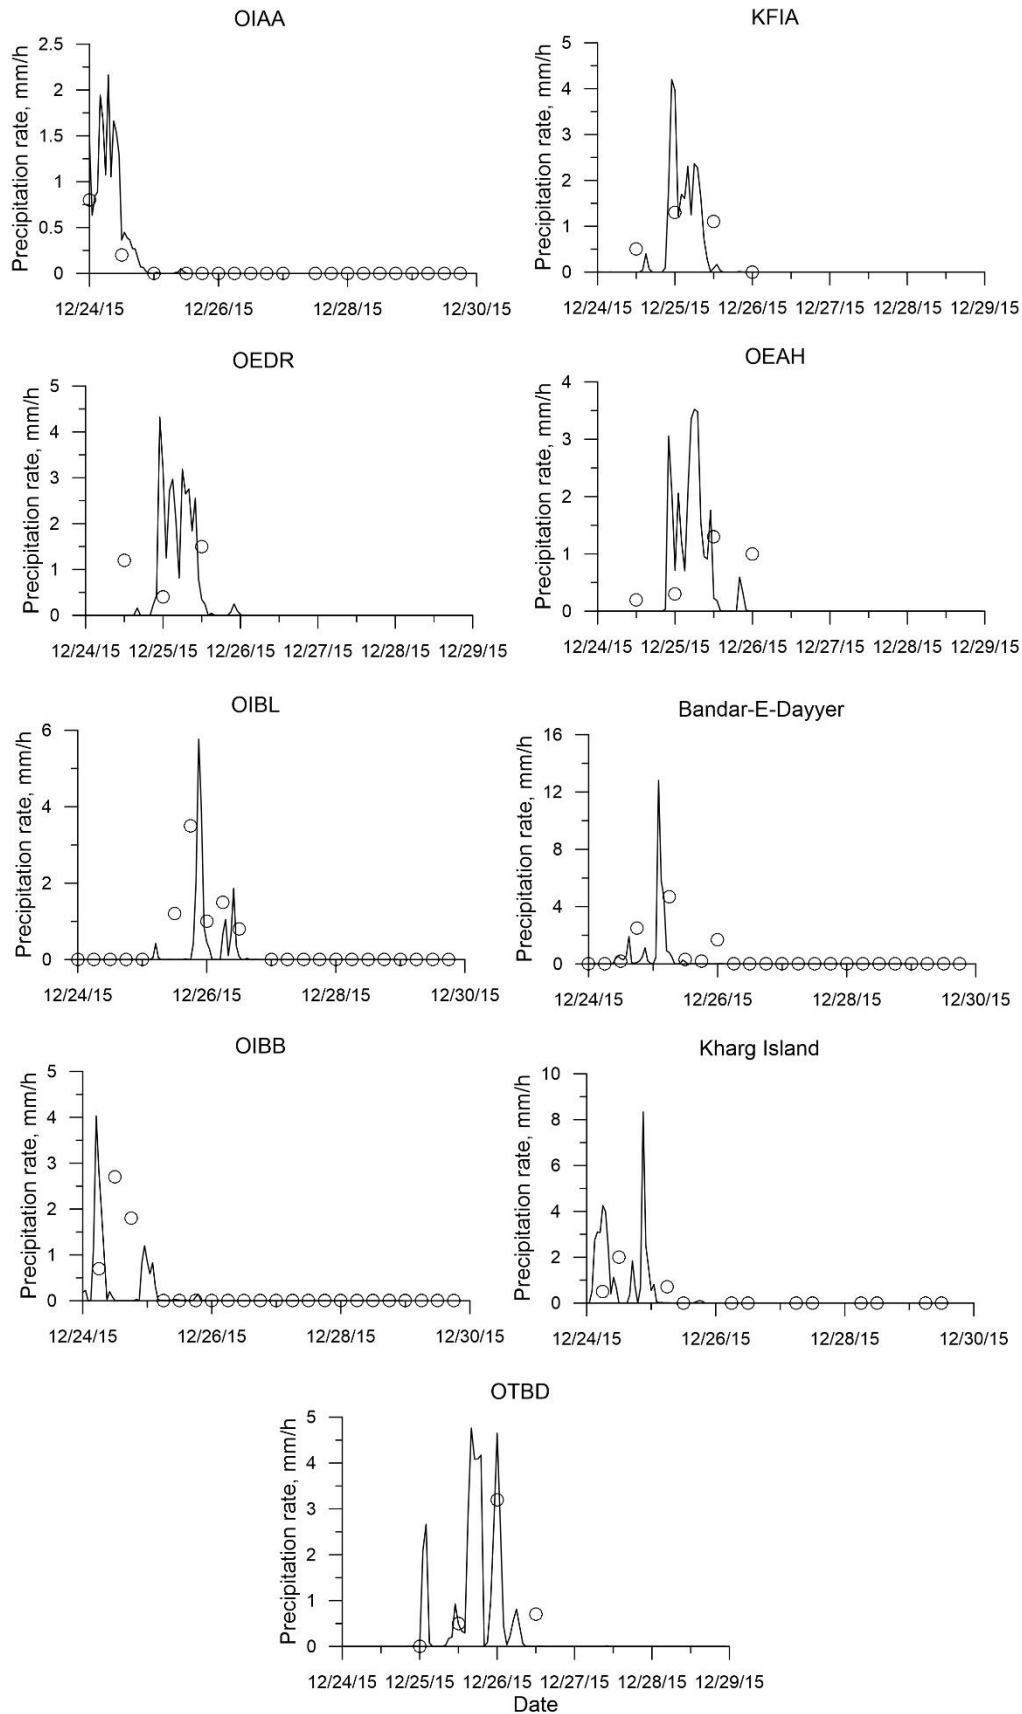

**Figure S1.** Precipitation intensities calculated by WRF (line) for the period 24-29 Dec 2015 compared with respective measurements (circles) extracted from Wolfram database  
<https://reference.wolfram.com/language/ref/WeatherData.html>

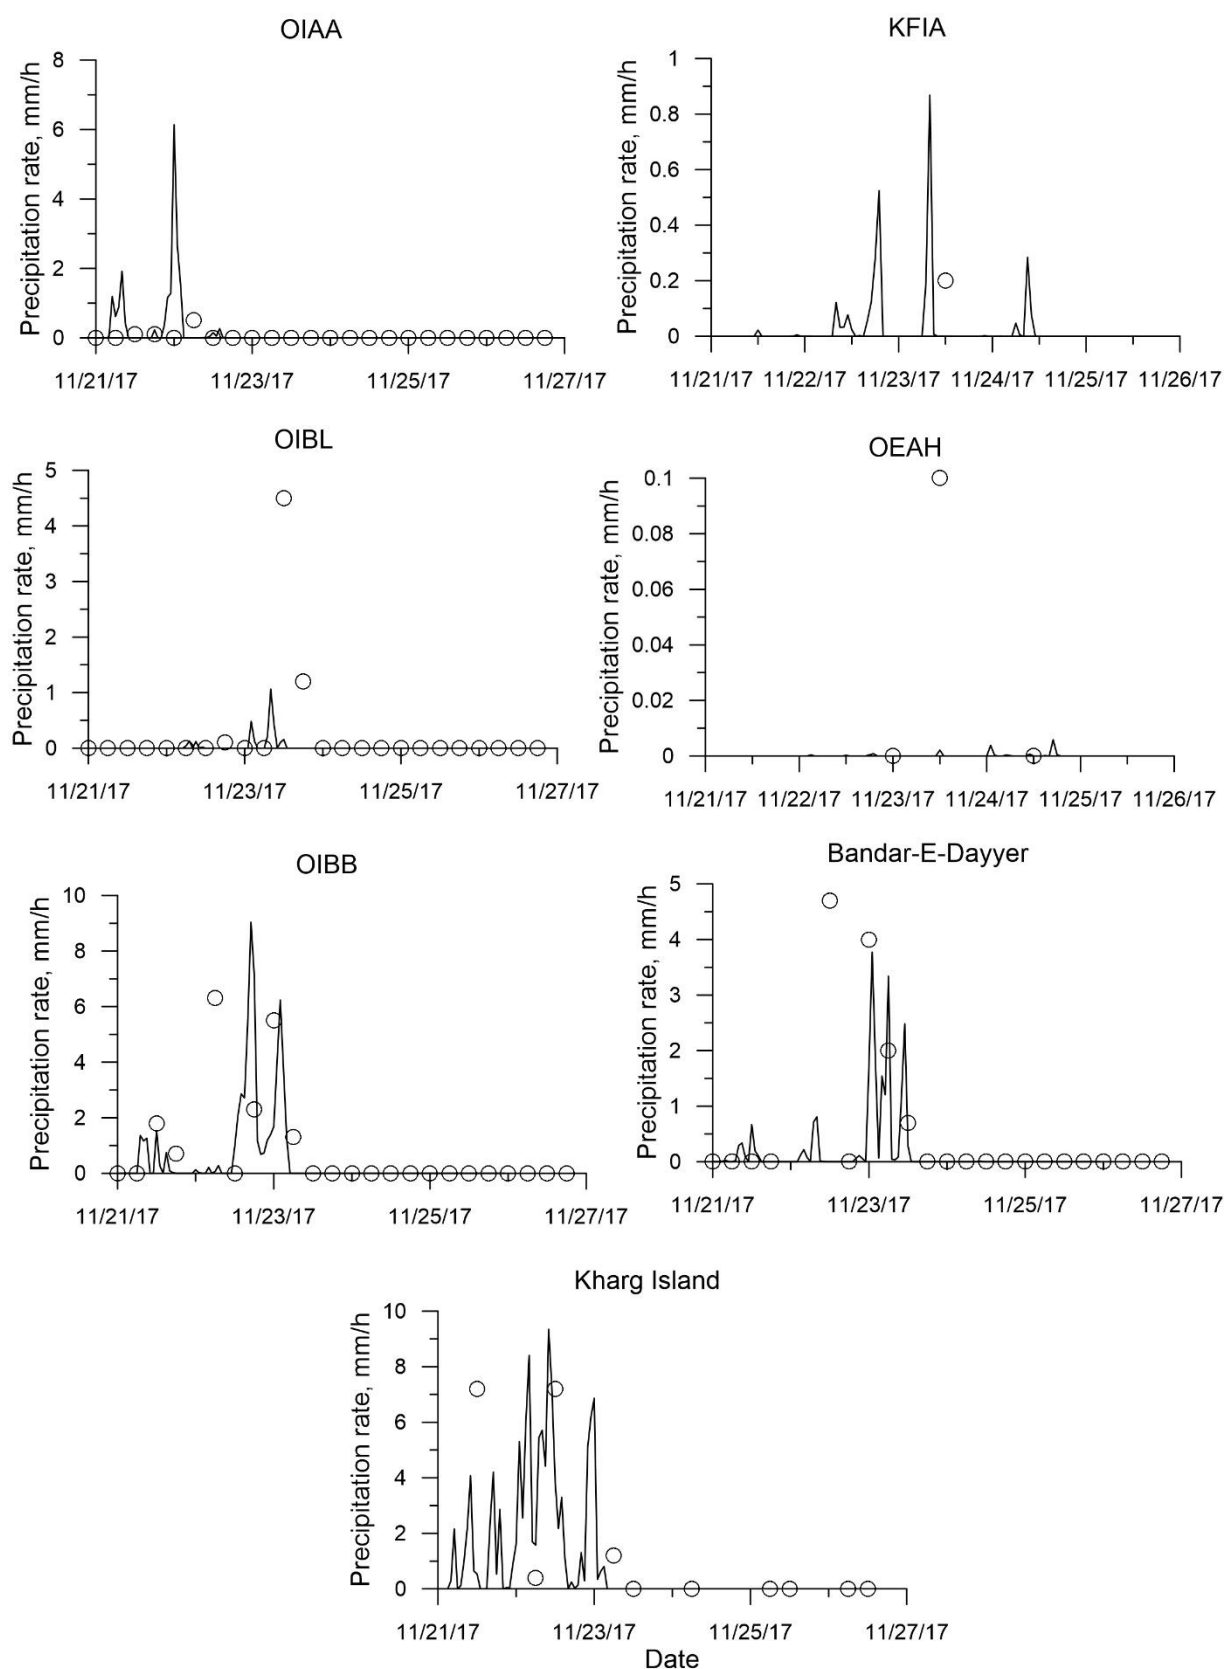

**Figure S2.** Precipitation intensities calculated by WRF (line) for the period 21-26 Nov 2017 compared with respective measurements (circles) extracted from Wolfram database

<https://reference.wolfram.com/language/ref/WeatherData.html>

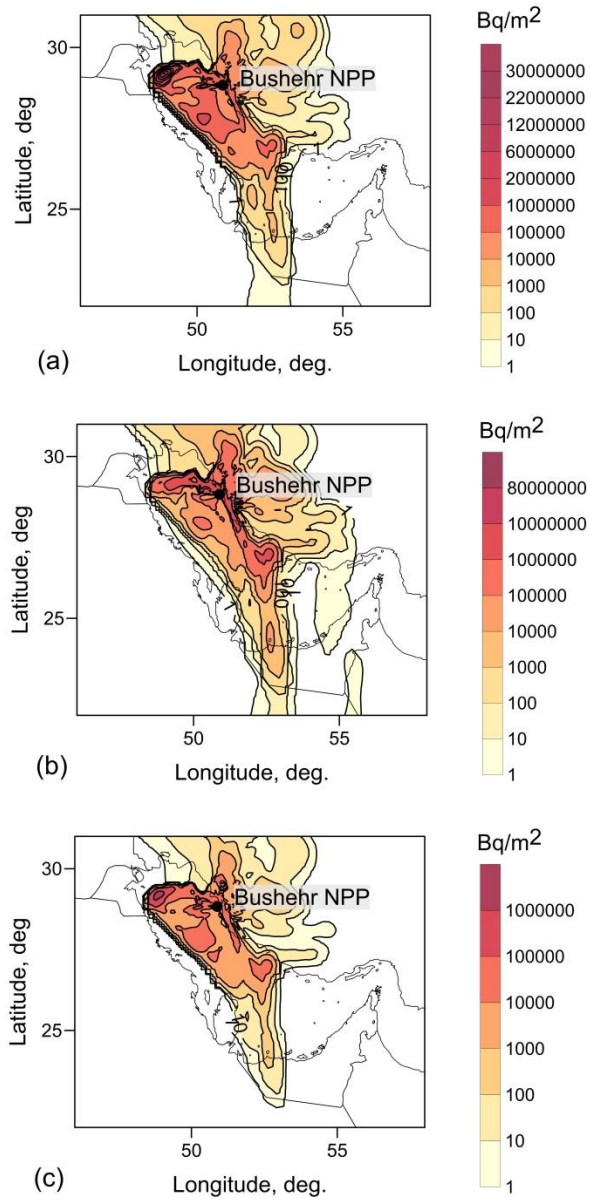

**Figure S3.** Maps of total (dry+wet) deposition density of (a)  $^{134}\text{Cs}$ , (b)  $^{106}\text{Ru}$ , (c)  $^{90}\text{Sr}$  simulated by JRODOS system for the hypothetical accident scenario at Bushehr NPP started on 24 Dec 2015, 08:00 h UTC; deposition maps are dated 96 h after the start of the accident scenario.

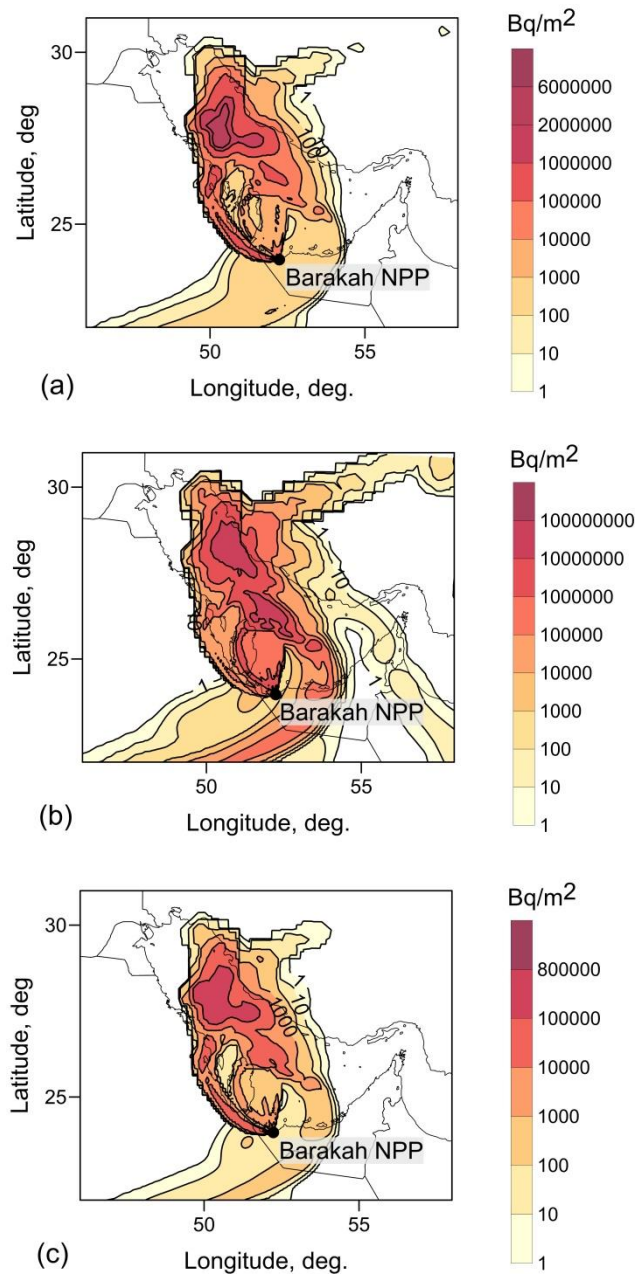

**Figure S4.** Maps of total (dry+wet) deposition density of (a)  $^{134}\text{Cs}$ , (b)  $^{106}\text{Ru}$ , (c)  $^{90}\text{Sr}$  simulated by JRODOS system for the hypothetical accident scenario at Barakah NPP started on 21 Nov 2017, 15:43h UTC; deposition maps are dated 96 h after the start of the accident scenario.

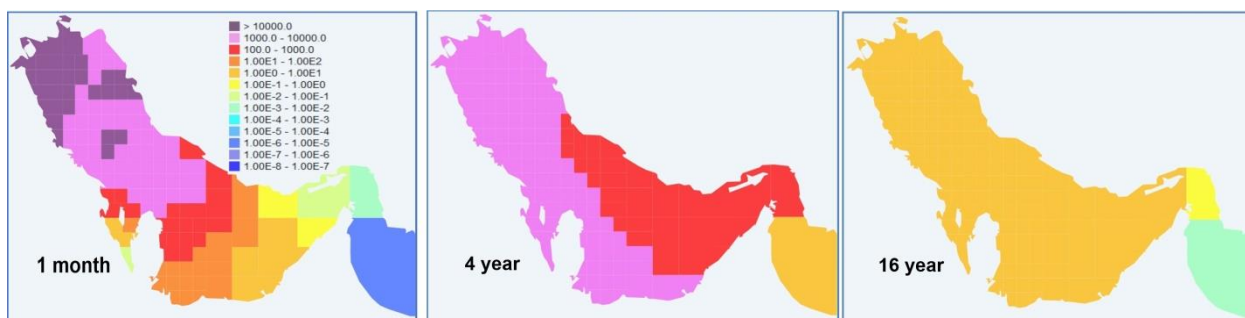

**Figure S5.** Distribution of the  $^{134}\text{Cs}$  concentration in water ( $\text{Bq m}^{-3}$ ) at the Arabian Gulf surface after deposition for the hypothetical accident scenario at Bushehr NPP.

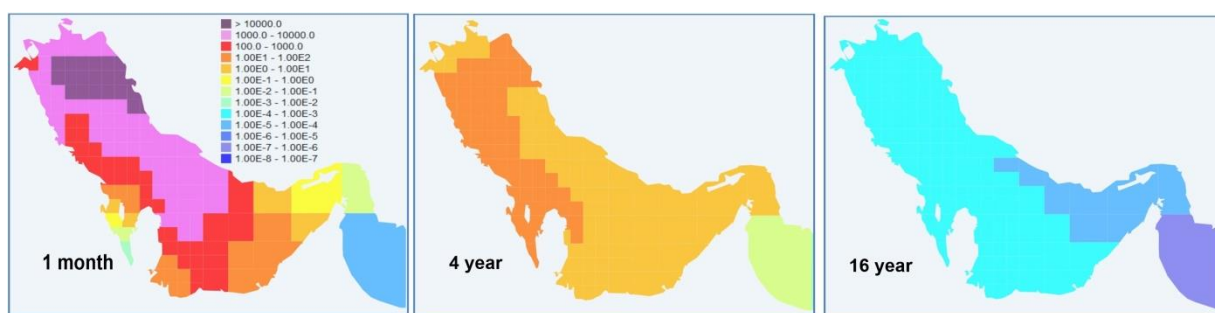

**Figure S6.** Distribution of the  $^{106}\text{Ru}$  concentration in water ( $\text{Bq m}^{-3}$ ) at the Arabian Gulf surface after deposition for the hypothetical accident scenario at Bushehr NPP.

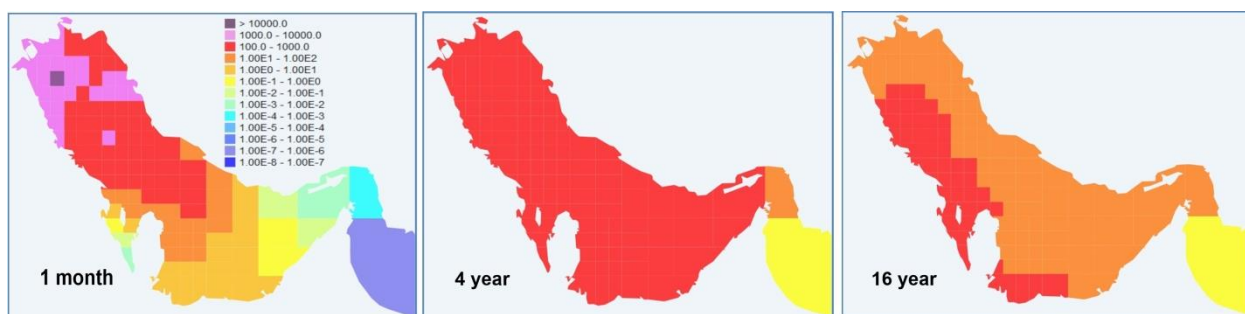

**Figure S7.** Distribution of the  $^{90}\text{Sr}$  concentration in water ( $\text{Bq m}^{-3}$ ) at the Arabian Gulf surface after deposition for the hypothetical accident scenario at Bushehr NPP.

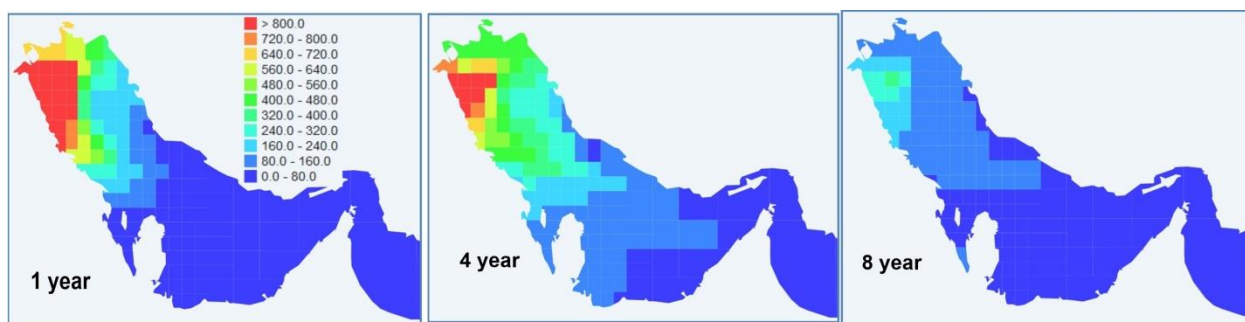

**Figure S8.** Distribution of the  $^{134}\text{Cs}$  concentration in the upper layer of sediment ( $\text{Bq kg}^{-1}$ ) at the Arabian Gulf surface after deposition for the hypothetical accident scenario at Bushehr NPP.

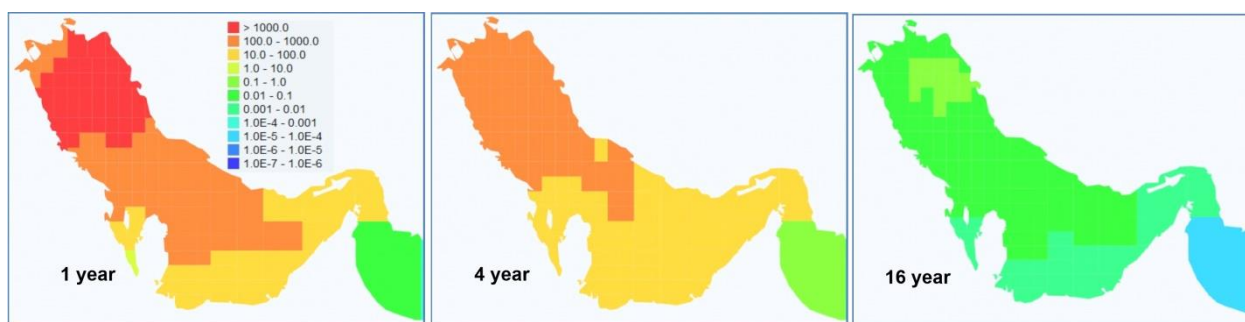

**Figure S9.** Distribution of the  $^{106}\text{Ru}$  concentration in the upper layer of sediment ( $\text{Bq kg}^{-1}$ ) at the Arabian Gulf surface after deposition for the hypothetical accident scenario at Bushehr NPP.

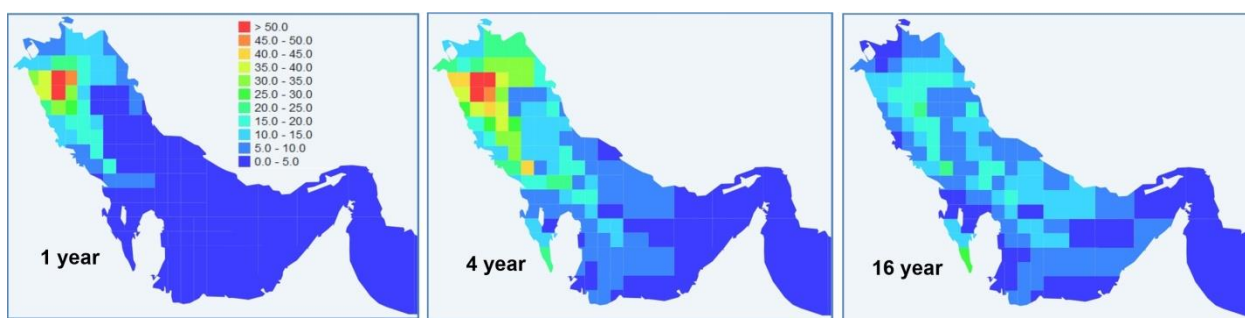

**Figure S10.** Distribution of the  $^{90}\text{Sr}$  concentration in the upper layer of sediment ( $\text{Bq kg}^{-1}$ ) at the Arabian Gulf surface after deposition for the hypothetical accident scenario at Bushehr NPP.

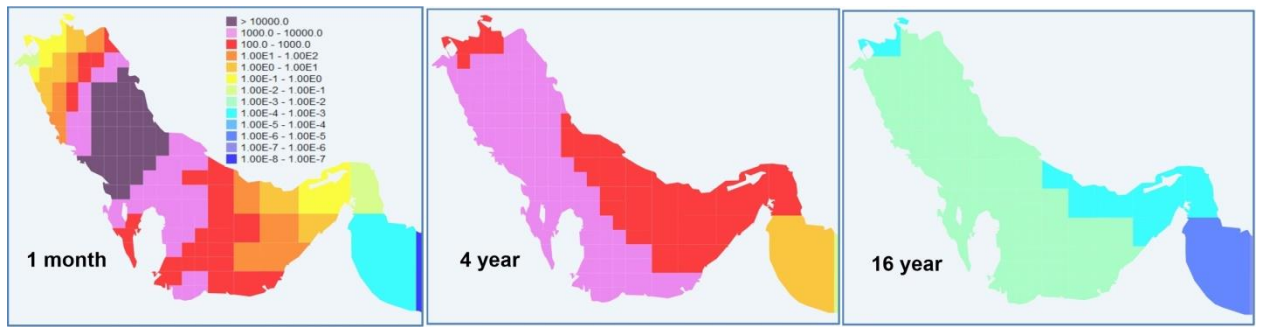

**Figure S11.** Distribution of the  $^{134}\text{Cs}$  concentration in water ( $\text{Bq m}^{-3}$ ) at the Arabian Gulf surface after deposition for the hypothetical accident scenario at Barakah NPP.

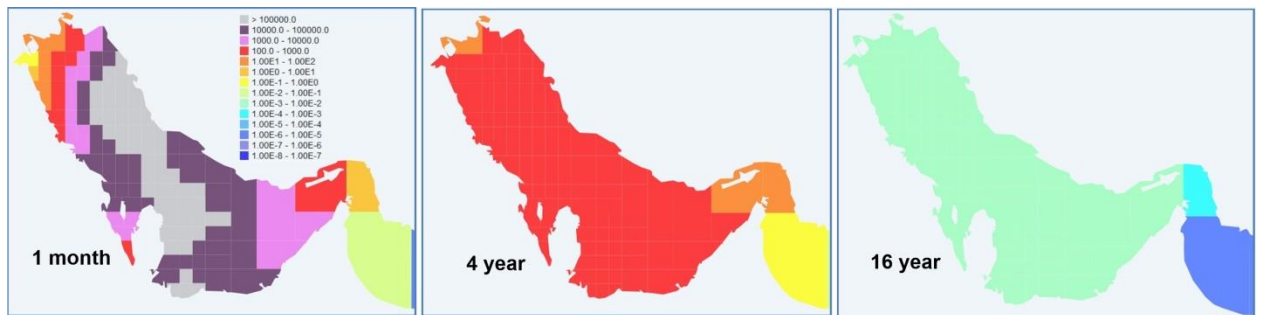

**Figure S12.** Distribution of the  $^{106}\text{Ru}$  concentration in water ( $\text{Bq m}^{-3}$ ) at the Arabian Gulf surface after deposition for the hypothetical accident scenario at Barakah NPP.

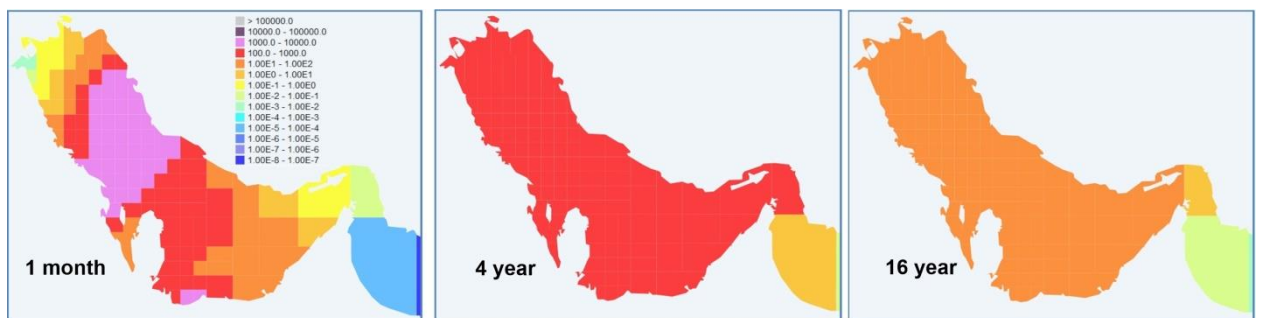

**Figure S13.** Distribution of the  $^{90}\text{Sr}$  concentration in water ( $\text{Bq m}^{-3}$ ) at the Arabian Gulf surface after deposition for the hypothetical accident scenario at Barakah NPP.

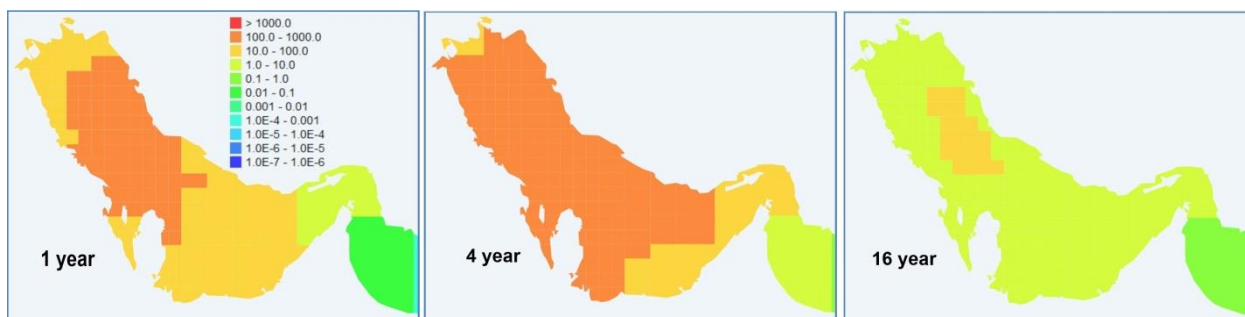

**Figure S14.** Distribution of the  $^{134}\text{Cs}$  concentration in the upper layer of sediment ( $\text{Bq kg}^{-1}$ ) at the Arabian Gulf surface after deposition for the hypothetical accident scenario at Barakah NPP.

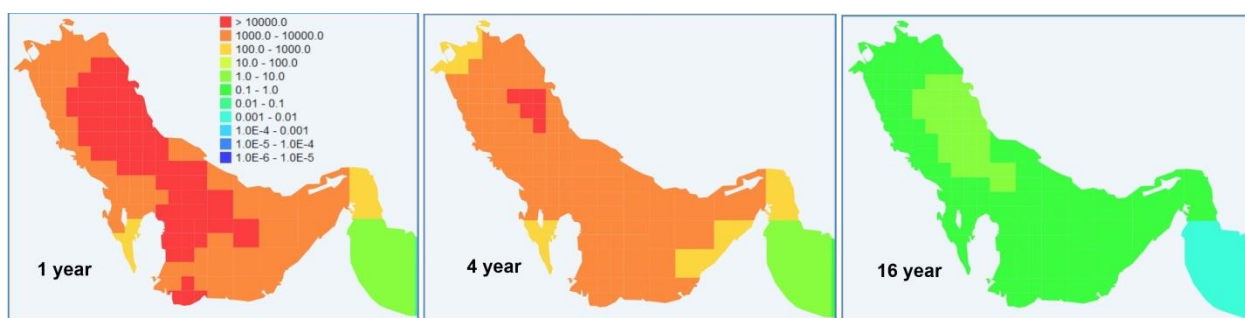

**Figure S15.** Distribution of the  $^{106}\text{Ru}$  concentration in the upper layer of sediment ( $\text{Bq kg}^{-1}$ ) at the Arabian Gulf surface after deposition for the hypothetical accident scenario at Barakah NPP.

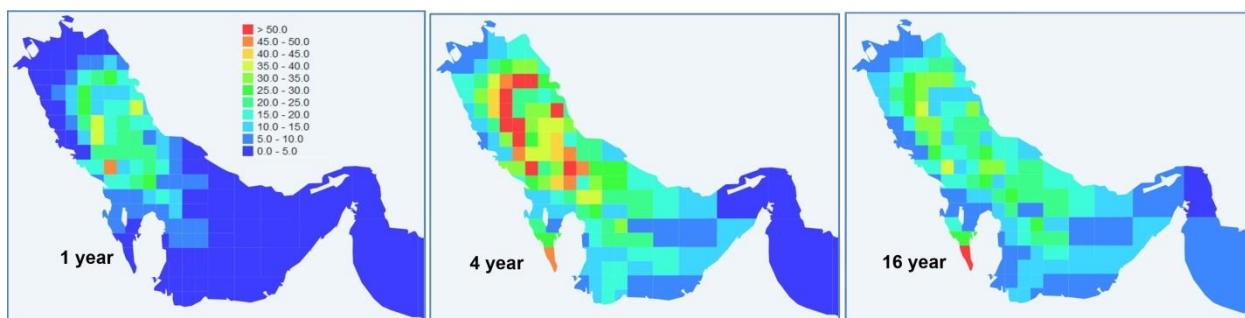

**Figure S16.** Distribution of the  $^{90}\text{Sr}$  concentration in the upper layer of sediment ( $\text{Bq kg}^{-1}$ ) at the Arabian Gulf surface after deposition for the hypothetical accident scenario at Barakah NPP.
